# Supplementary material
Source: PubMed Central journal article supplement (PMC6043363)
Supplement: NIHMS967182-supplement-supplement.pdf [file NIHMS967182-supplement-supplement.pdf]

## Online Data Supplement

### **Bradykinin stimulates renal Na<sup>+</sup> and K<sup>+</sup> excretion by inhibiting the K<sup>+</sup> channel (Kir4.1) in the distal convoluted tubule.**

Dan-Dan Zhang<sup>1</sup>, Zhong-Xiuzi Gao<sup>2</sup>, Carlos P Vio<sup>3</sup>, Yu Xiao<sup>1</sup>, Peng Wu<sup>2</sup>, Hao Zhang<sup>1</sup>, Xi-Wen Guo<sup>1</sup>, Xin-Xin Meng<sup>1</sup>, Li Gu<sup>1</sup>, Jun-Lin Wang<sup>1</sup>, Xin-Peng Duan<sup>1</sup>, Dao-Hong Lin<sup>2</sup>, Wen-Hui Wang\*<sup>2</sup> and Ruimin Gu\*<sup>1</sup>

<sup>1</sup>Department of Physiology, Harbin Medical University, Harbin, China; <sup>2</sup>Department of Pharmacology, New York Medical College, Valhalla, NY, and <sup>3</sup>Center for Ageing and Regeneration Care-UC, Department of Physiology, Pontificia Universidad Catolica de Chile, Santiago, Chile.

Running Title: Bradykinin and NCC

Corresponding address:

Dr. Ruimin Gu

Department of Physiology  
Harbin Medical University  
(tel&fax) 008645186697507  
[ruimingu2916@163.com](mailto:ruimingu2916@163.com)

Or

Dr. Wen-Hui Wang  
Department of Pharmacology  
New York Medical College  
Valhalla, NY 10595  
(tel) 914 594 4139  
(fax) 914 347 4956  
[wenhui\\_wang@nymc.edu](mailto:wenhui_wang@nymc.edu)

**\*co-corresponding authors**

## **Material and Methods**

### ***Preparation of the DCT***

Mice were sacrificed by CO<sub>2</sub> inhalation plus cervical dislocation. After mice were sacrificed, the abdomen was opened to expose the left kidney, we perfused the left kidney with 2 ml L-15 medium (Life Technology) containing Type 2 collagenase (250 unit/ml). The collagenase-perfused kidney was then removed for further dissection. The renal cortex was separated and cut into small pieces for additional incubation in collagenase-containing L-15 media for 30-50 min at 37°C. The tissue was then washed three times with fresh L-15 medium and transferred to an ice-cold chamber for dissection. The isolated DCT tubules were placed on a small cover glass coated with poly-lysine and the cover glass was placed on a chamber mounted on an inverted microscope. For continuous perfusion of bradykinin (4 µg/min/kg BW) or vehicles for 3 days, the mice were implanted subcutaneously with an osmotic mini-pump (Model. 1007D, Alzet). The animal use protocol was approved by independent animal usage committee in both NYMC and Harbin Medical University.

### ***Generating KS-Kir4.1 knockout (KO) mice***

Mice expressing Pax8-rtTA and tet-on LC-1 transgene were crossed with *Kcnj10*-floxed mice to generate inducible kidney-specific *Kcnj10* knockout mice (KS-*Kcnj10*<sup>-/-</sup>). *Kcnj10* deletion was carried out in 8-week-old male and/or female mice homozygous for floxed *Kcnj10* gene and heterozygous for Pax8-rtTA/LC-1 transgene by providing doxycycline (5mg/ml, 5% sucrose) in the drinking water for 2 weeks. This was followed by at least 2 additional weeks without doxycycline treatment, before performing experiments. Littermate mice of the same age and genetic background drinking 5% sucrose were used as controls (*Kcnj10*<sup>+/+</sup>).

### ***Genotyping***

Tail DNA was PCR amplified with the following primers: *kcnj10* forward 5'-TGATGTATCTCGATTGCTGC-3' and reverse 5'-CCCTACTCAATGCTCTTAAC-3' yielding a 550 bp product from the floxed *Kcnj10* gene and a 420 bp product from the wild-type allele; Pax8rtTA forward 5'CCATGTCTAGACTGGACAAGA-3' and Pax8rtTA reverse 5'-CAGAAAGTCTTGCCATGACT-3' which yields a 220 bp product; and LC1-CRE forward 5'-TTTCCCGCAGAACCTGAAGATG-3' and reverse 5'-TCACCGGCATCAACGTTTTCTT-3' which yields a 190 bp product.

### ***Single channel recording***

Single channel patch-clamp experiments were performed in the basolateral membrane of the DCT. Single K<sup>+</sup> channel currents were recorded with an Axon200B amplifier (Axon), low-pass filtered at 1 KHz, and digitized by an Axon interface (Digidata 1332) with sampling rate of 4 KHz. For the calculation of channel numbers, we selected a channel recording at least 10 min long. We determine the channel open probability (P<sub>o</sub>) from the channel number (N) and NP<sub>o</sub> (a product of channel number and open probability) which was calculated from data samples of 60 seconds duration in the steady state. NP<sub>o</sub> was determined using the following equation:

$$NP_o = \Sigma(t_1 + 2t_2 + \dots + it_i)$$

where  $t_i$  is the fractional open time spent at each of the observed current levels. The channel conductance was determined by measuring the current amplitudes over several voltages.

### ***Whole cell recording***

Whole-cell patch-clamp experiments were performed in the early portion of the DCT (DCT1). An Axon 200A amplifier was used for the measurement of  $K^+$  current ( $I_K$ ) reversal potential and  $Ba^{2+}$ -sensitive  $K^+$  currents. For measuring  $I_K$  reversal potential, the tip of the pipette was filled with pipette solution containing (in mmol/l) 140 KCl, 2 MgCl<sub>2</sub>, 1 EGTA, and 5 HEPES (pH 7.4). The pipette was then back-filled with the pipette solution containing amphotericin B (20  $\mu$ g/0.1 ml). The bath solution is the same as the one we used to perform the single channel recordings. For the measurement of whole-cell  $Ba^{2+}$ -sensitive  $K^+$  currents, the bath solution contains (in mmol/L) 140 KCl, 2 MgCl<sub>2</sub>, 1.8 CaCl<sub>2</sub> and 10 HEPES (pH=7.4). After forming a high resistance seal (>2 G $\Omega$ ), the membrane capacitance was monitored until the whole-cell patch configuration was formed. The currents were low-pass filtered at 1 KHz, digitized by an Axon interface with 4 KHz sampling rate (Digidata 1440A). Data were analyzed using the pClamp software system 9.0 (Axon).

### ***Immunoblotting***

Whole kidney protein extract was obtained from frozen kidney homogenized in a buffer containing (in mmol/L) 250 sucrose, 50 Tris-HCl pH 7.5, 1 EDTA, 1 EGTA, 1 DTT supplemented with phosphatase and protease inhibitor cocktails (Sigma). Protein (40-60  $\mu$ g) was separated on 7% (wt/vol) Tris-Glycine gel and transferred to nitrocellulose membrane. The membranes were incubated 2 hours with 5% milk in TBS-T and then incubated overnight at 4°C with primary antibodies (NCC, pNCC at Thr<sup>53</sup>, and NKCC2) with 1:1000 dilution. The membrane was then examined with Protein Simple infrared imaging system (FlourChem R).

### ***Procedures for renal clearance***

Animal were anesthetized by 2-4% isoflurane through inhaling mask. The mice were placed on a heated small blanket to maintain body temperature at 37°C. The trachea was cannulated to clear any mucus that may be produced during the experiment. A carotid artery was catheterized with PE10 tubing for blood collection, jugular vein was also cannulated for iv infusion. The bladder was exposed and catheterized via a suprapubic incision with a 10 cm piece of PE-10 tubing for urine collections. After completion of surgery, isotonic saline was given intravenously for 4 hr (0.3 ml/1 hr 0.9% saline) to replace surgical fluid losses and to maintain hemodynamics. To study the effect of bradykinin on urinary  $Na^+$  and  $K^+$  excretion, one time perfusion of bradykinin (0.5 ng/kg BW) was used. Urine collections started one hr after infusion of 0.3 ml saline and total 6 collections (every 30 minutes) were performed (2 for controls and 4 for experiments). After renal clearance experiment, the mice were sacrificed by IV somnasol.

## Result

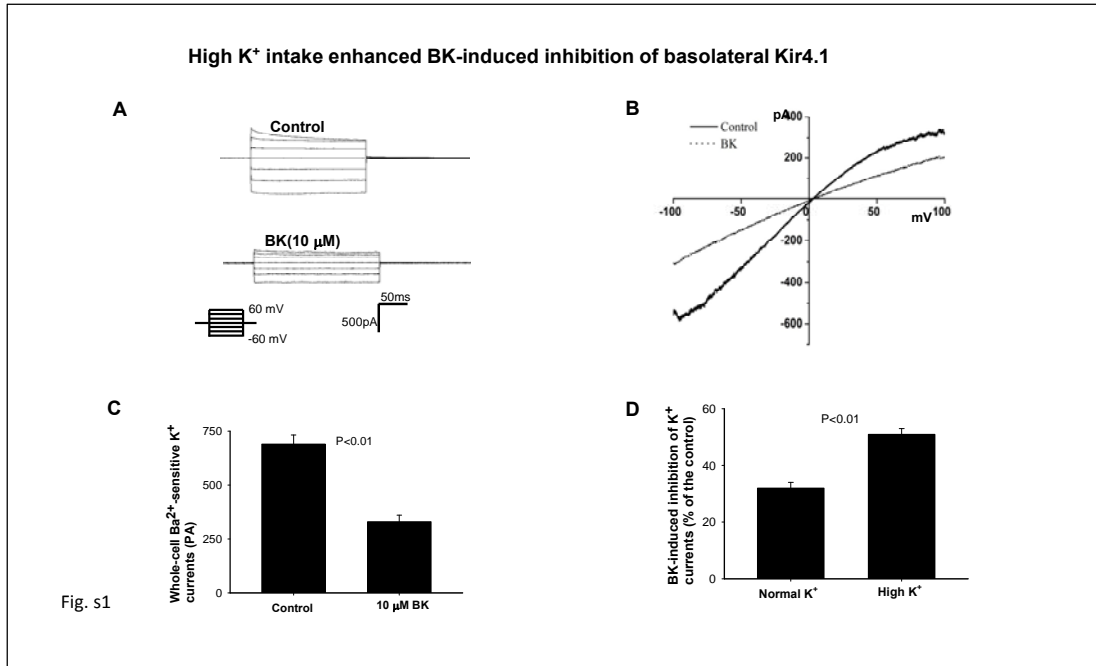

**Fig. s1** **HK intake enhanced the inhibitory effect of BK on the basolateral K<sup>+</sup> conductance.** (A) A whole-cell recording shows the Ba<sup>2+</sup>-sensitive K<sup>+</sup> currents in the DCT of the mice on HK diet for 7 days and currents was measured from -60 mV to 60 mV at a 20 mV step. (B) A recoding demonstrating the whole-cell K<sup>+</sup> currents measured in the DCT with RAMP protocol from -100 mV to 100 mV in the mice on a HK diet for 7 days. (C) A bar graph summarizes the results of 7 experiments showing that BK treatment decreased the K<sup>+</sup> currents. (D) A bar graph showing that HK intake enhanced the inhibitory effect of BK on the basolateral K<sup>+</sup> channels in the DCT in comparison to the group with normal K<sup>+</sup> diet (n=7).

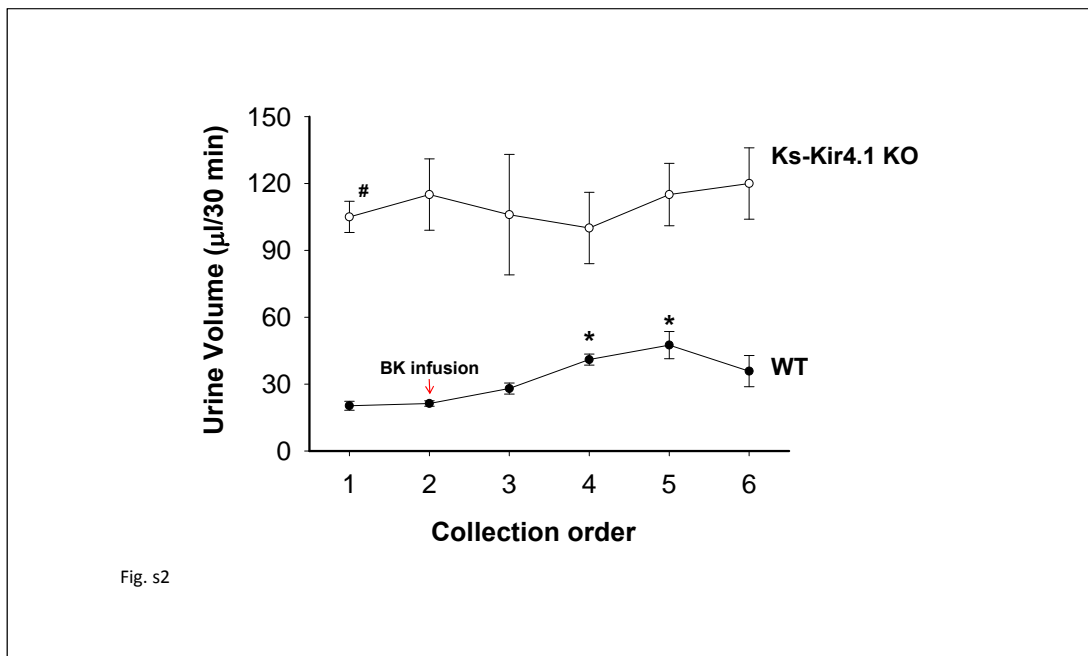

Fig. s2

**Fig.s2 Effect of BK infusion on urine volume of WT and Ks-Kir4.1 KO mice.** For the clearance study, the mice were intravenously perfused with isotonic saline for 4 hr (0.3 ml/1 hr containing 140 mM Na<sup>+</sup> and 5 mM K<sup>+</sup>) and urine collections started one hr after saline infusion. After two collections (1 and 2) before BK injection (control), 100 µl saline containing 100 µM BK (indicated by a red arrow) was infused and 4 collections (every 30 min) were made. “\*” indicates the value is significantly different from the control (1<sup>st</sup> and 2<sup>nd</sup> collections). “#” indicates the difference in urine volume of Ks-Kir4.1 KO mice is significantly different from WT (determined by two-way ANOVA).

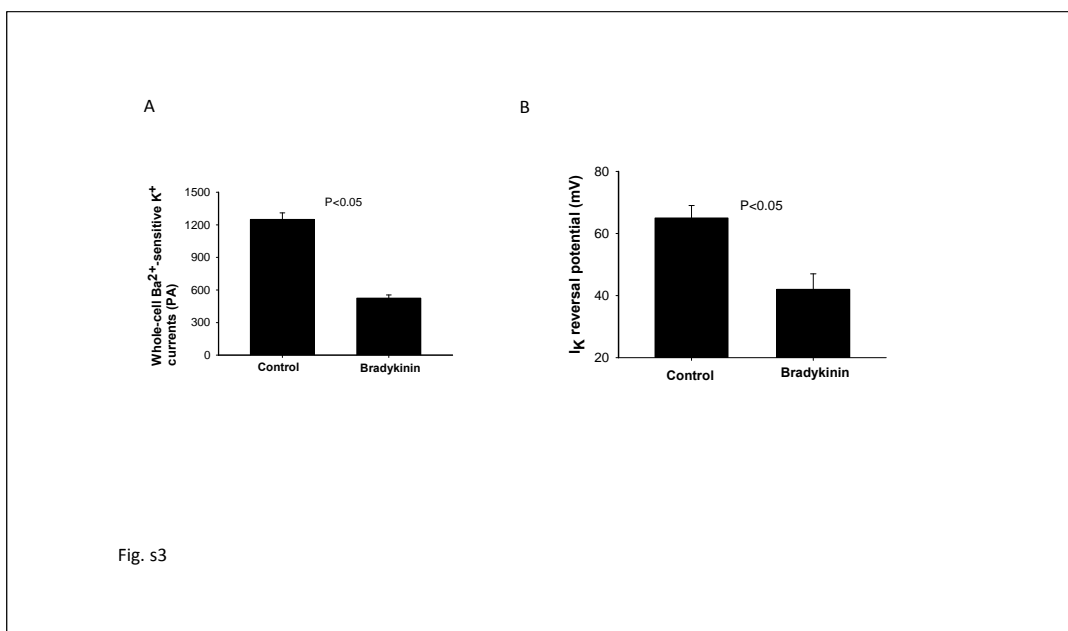

Fig. s3

Fig.s3 **Effect of BK infusion on whole-cell  $K^+$  currents and  $I_K$  reversal potential** (A) A bar graph summarizes the results of experiments in which  $Ba^{2+}$ -sensitive  $K^+$  currents were measured at -60 mV in the DCT from control (vehicle) and BK-treated mice (n=6). BK was infused through an osmotic pump (4 g/min/kg BW) for three days. (B) A bar graph summarizes the results of experiments in which  $I_K$  reversal potential of the DCT was measured from control (vehicle) and BK-treated mice (n=7). The  $I_k$  reversal potential was measured with whole-cell recording with 140 mmol/L  $K^+$  in the pipette (intracellular solution) and 140 mmol/L  $Na^+$ /5 mmol/L  $K^+$  in the bath.

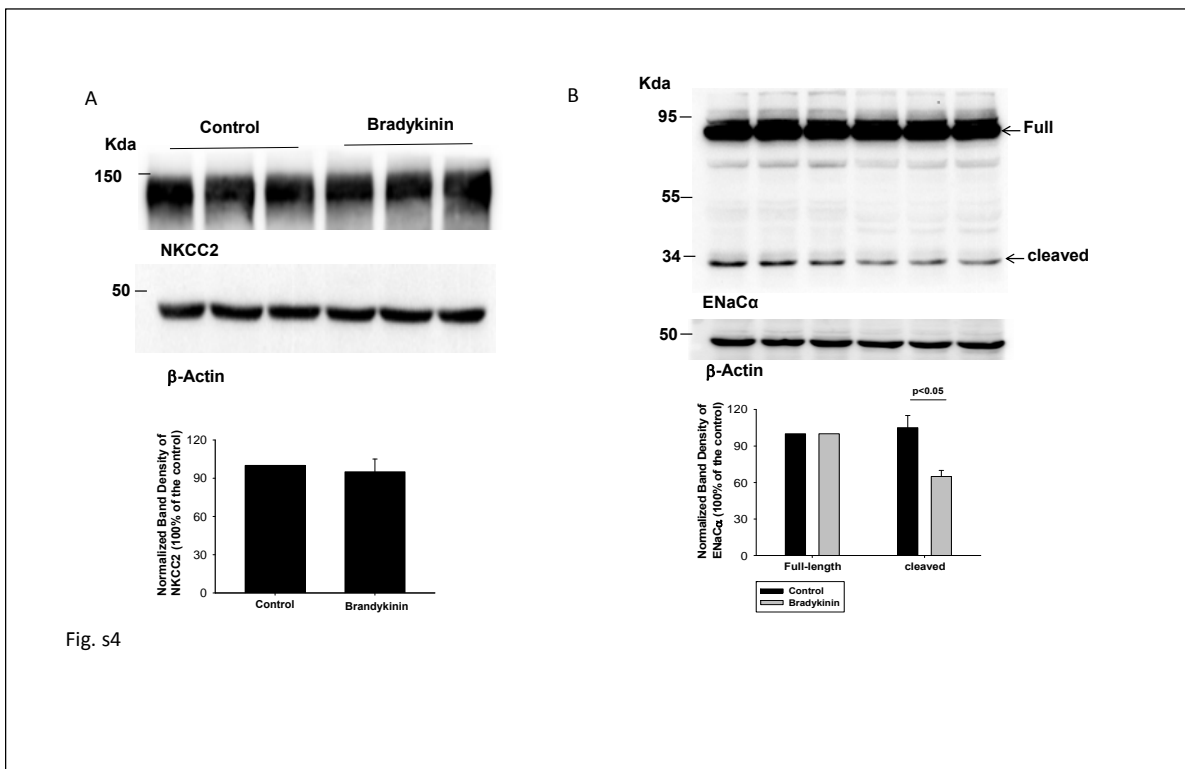

**Figs4 BK infusion does not affect the expression of NKCC2 but decreases the expression of cleaved ENaC $\alpha$ .** Western blot showing the expression of NKCC2 (A) and ENaC $\alpha$  (B) in the kidneys obtained from control (vehicle) and BK treated mice (three days).
